# Supplementary material for: Zukunft der akutstationären Rheumatologie in Deutschland
Source: Springer Nature journal article supplement (doi:10.1007/s00393-020-00939-4), 2020-12-12
Supplement: MOESM1 [file 18678360]

## Zusatzmaterial

Tabelle zur Zuordnung von Qualitätskriterien

| Leistungsbereich Rheumatologie               |                                          |                          |                                                                                                                                                                           |                                                                 |                        |                         |                                                                                                                                                                                                                                                                                                                                                         |                       |                  |                                                                                                                                                                                      |
|----------------------------------------------|------------------------------------------|--------------------------|---------------------------------------------------------------------------------------------------------------------------------------------------------------------------|-----------------------------------------------------------------|------------------------|-------------------------|---------------------------------------------------------------------------------------------------------------------------------------------------------------------------------------------------------------------------------------------------------------------------------------------------------------------------------------------------------|-----------------------|------------------|--------------------------------------------------------------------------------------------------------------------------------------------------------------------------------------|
| Leistungsgruppe                              |                                          | Erbringung verwandter LG |                                                                                                                                                                           | Vorhaltung Geräte                                               | Fachärztliche Vorgaben |                         | Sonstige Struktur- und Prozesskriterien                                                                                                                                                                                                                                                                                                                 | Mindestmengenvorgaben |                  | OPS und/oder ICD                                                                                                                                                                     |
|                                              |                                          | Standort                 | Kooperation                                                                                                                                                               |                                                                 | Qualifikation          | Verfügbarkeit           |                                                                                                                                                                                                                                                                                                                                                         | ja/nein               | wenn ja, welche? |                                                                                                                                                                                      |
| Großgefäßvaskulitiden                        | Mindestvoraussetzung                     | Rheumatologie            |                                                                                                                                                                           | Farb-Duplexsonographie                                          | FA Rheumatologie       | 2 FÄ, davon eine/r 24/7 | Fast-Track-Diagnostik inkl. Farbduplexsonographie innerlab von 24 Stunden, Verfügbarkeit Biopsie der Temporalarterien, Zugang zu bildgebender Großgeräte-Diagnostik der extrakraniellen Gefäße (MRT und/oder PET-CT), akutstationäre Strukturqualität (Lakomek et al. 2011).                                                                            | nein                  | s. Appendix      | M31.5, M31.6, M31.4, OPS-8-983                                                                                                                                                       |
|                                              | Auswahlkriterium                         |                          | Radiologie, Nuklearmedizin, Ophthalmologie, Pathologie                                                                                                                    | MRT-Angiographie, PET-CT, CT-Angiographie                       |                        |                         |                                                                                                                                                                                                                                                                                                                                                         |                       |                  |                                                                                                                                                                                      |
| Vaskulitiden kleiner und mittelgroßer Gefäße | Mindestvoraussetzung                     | Rheumatologie            |                                                                                                                                                                           | Farbduplex-Sonographie, Sonographie                             | FA Rheumatologie       | 2 FÄ, davon eine/r 24/7 | Mikroskopische Urinuntersuchung am Standort, Ergebnis Autoimmunserologie (PR3-ANCA, MPO-ANCA, GBM-Antikörper) innerhalb von 24 Stunden, akutstationäre Strukturqualität (Lakomek et al, 2011)                                                                                                                                                           | nein                  | s. Appendix      | M30.0, M30.1, M30.2, M30.8, M30.1, M35.2, M31.3, M31.7 L95.8, D89.1, D69, OPS 8-983                                                                                                  |
|                                              | Auswahlkriterium                         |                          | Nephrologie, Pneumologie, Neurologie, Ophthalmologie, Radiologie, Intensivmedizin                                                                                         | Endoskopie, CT, MRT                                             |                        |                         | Plasmapherese (für Kryoglobulinämie, anti-GBM-Erkrankung) und Intensivmedizin in Kooperation                                                                                                                                                                                                                                                            |                       |                  |                                                                                                                                                                                      |
| Rheumatoide Arthritis                        | Mindestvoraussetzung                     | Rheumatologie            |                                                                                                                                                                           | Farb-Duplexsonographie, Sonographie                             | FA Rheumatologie       | 2 FÄ, davon eine/r 24/7 | Physiotherapie, Ergotherapie, Psychologie, multimodale rheumatologische Komplextherapie (OPS 8-983), akutstationäre Strukturqualität (Lakomek et al, 2011)                                                                                                                                                                                              | nein                  | s. Appendix      | M05.00; M06.00, OPS 8-983, OPS 8-020.4, OPS 8-020.5, OPS 8-158, OPS 8-159, OPS 6-001/2/3/5/6/9/a, OPS 8-983; OPS 1-854; OPS-8-020.4,5                                                |
|                                              | Auswahlkriterium                         |                          | Radiologie, Pneumologie, Orthopädie                                                                                                                                       | CT, MRT, Bronchoskopie, DXA-Messplatz                           |                        |                         |                                                                                                                                                                                                                                                                                                                                                         |                       |                  |                                                                                                                                                                                      |
| Kollagenosen                                 | Mindestvoraussetzung                     | Rheumatologie            |                                                                                                                                                                           | Sonographie, Farbduplexsonographie, Kapillarmikroskopie         | FA Rheumatologie       | 2 FÄ, davon eine/r 24/7 | Sonographien innerhalb von 24 Stunden, Verfügbarkeit Biopsie der Muskulatur, Verfügbarkeit Biopsie Haut, Biopsie N. Suralis, Biopsie Niere, Zugang zu bildgebender Großgeräte-Diagnostik (CT, MRT, ggf auch PET), enge Zusammenarbeit mit den kooperierenden Fachgebieten für Diagnostik und Therapie, Physio- und Physikalische Therapie, Ergotherapie | nein                  | s. Appendix      | M 32.0, M32.1, M32.8; M34.0, M34.1, M34.2, M34.8; M35.4; M33.0, M33.1, M33.2; M36.0, M35.1, M35.0; zahlreiche *Diagnosen und Nebendiagnosen, OPS: 8-54, 6-00, 8-561, 8-983; u.v.a.m. |
|                                              | Auswahlkriterium                         |                          | Immunlabor, Nephrologie, Pulmonologie, Neurologie, Radiologie, Gastroenterologie, Angiologie oder Gefäßchirurgie, (HNO, Ophthalmologie), Intensivmedizin, Schmerztherapie | Echo, MRT, CT (PET), EKG, Bodyplethysmographie, LZ-RR und -EKG, |                        |                         |                                                                                                                                                                                                                                                                                                                                                         |                       |                  |                                                                                                                                                                                      |
| Spondyloarthritiden                          | Mindestvoraussetzung                     | Rheumatologie            |                                                                                                                                                                           | Farb-Duplexsonographie, Sonographie                             | FA Rheumatologie       | 2 FÄ, davon eine/r 24/7 | Physiotherapie, Ergotherapie, Psychologie, multimodale rheumatologische Komplextherapie (OPS 8-983), akutstationäre Strukturqualität (Lakomek et al, 2011)                                                                                                                                                                                              | nein                  | s. Appendix      | OPS 8-983, M46.8, M45.0, 8-020.4, 5, OPS-1-854                                                                                                                                       |
|                                              | Auswahlkriterium                         |                          | Radiologie, Unfallchirurgie, Orthopädie                                                                                                                                   | CT, MRT                                                         |                        |                         |                                                                                                                                                                                                                                                                                                                                                         |                       |                  |                                                                                                                                                                                      |
| multimodale rheumatologische Komplextherapie | Mindestvoraussetzung<br>Auswahlkriterium | Rheumatologie            |                                                                                                                                                                           |                                                                 | FA Rheumatologie       | 2 FÄ, davon eine/r 24/7 | Physiotherapie, Ergotherapie, Psychologie, Schmerztherapie                                                                                                                                                                                                                                                                                              | nein                  | s. Appendix      | OPS 8-983, OPS 8-986                                                                                                                                                                 |

### Appendix:

Die Festlegung von Mindestmengen einzelner Leistungsgruppen wird von den Rheuma-Experten nicht befürwortet. In 2011 hat der Verband Rheumatologischer Akutkliniken (VRA) gemeinsam mit Vorstandsmitgliedern der Deutschen Gesellschaft für Rheumatologie (DGRh) die "Strukturqualität" für akutstationäre Rheuma-Einrichtungen festgelegt (s. Tabelle). Hier wurde die Gesamtzahl akutstationär zu versorgender Menschen mit Rheuma auf mehr als 500 Fälle jährlich festgelegt, wobei der Anteil der entzündlich-rheumatischen Erkrankungen der Gelenke, der Wirbelsäule und des Bindegewebes mehr als 50 % betragen soll (Kriterium 5) [Lakomek et al., 2011]
